# Supplementary material for: In situ gelation regulating micro-electric fields to induce Li deposition in quasi-solid-state lithium metal batteries
Source: Royal Society of Chemistry journal article supplement (doi:10.1039/d1ta09435a), 2021-12-21
Supplement: d1ta09435a1.pdf [file d1ta09435a1.pdf]

## Supporting Information

# In-situ gelation regulating micro-electric fields to induced Li deposition in quasi-solid-state lithium metal batteries

Qiyu Wang <sup>a</sup>, Xiangqun Xu <sup>a</sup>, Bo Hong <sup>a,b\*</sup>, Maohui Bai <sup>a</sup>, Jie Li <sup>a</sup>, Zhian Zhang <sup>a</sup>, Yanqing Lai <sup>a,b\*</sup>

<sup>a</sup> School of Metallurgy and Environment, Central South University, Changsha 410083, PR China.

<sup>b</sup> Engineering Research Centre of Advanced Battery Materials, The Ministry of Education, Changsha 410083, Hunan, China

---

\*Corresponding author.

E-mail address: bop\_hong@163.com (B. Hong); laianqing@csu.edu.cn (Y. Lai).

**Supporting Information Contains:**

**S1. Calculation of ionic conductivity**

**S2. Calculation of  $\text{Li}^+$  transference numbers**

**S3. Calculation of activation energy**

**S4. Choice on different  $\text{Li}^+$  adsorption sites**

**S5. Crystal models for calculating the binding energy**

**S6. Corresponding charge density difference**

**S7. Room temperature storage experiment**

**S8. TGA analysis of commercial separator**

**S9. EIS of a SS|GPE 1%|SS symmetrical cell with the elevation of temperature**

**S10. EIS of a SS|GPE 2%|SS symmetrical cell with the elevation of temperature**

**S11. EIS of a SS|GPE 5%|SS symmetrical cell with the elevation of temperature**

**S12. Charge/discharge voltage curves of  $\text{LiFePO}_4$ |GPE 1%|Li**

**S13. Charge/discharge voltage curves of  $\text{LiFePO}_4$ |GPE 5%|Li**

**S14. Cyclic voltammograms and rate capability of  $\text{LiFePO}_4$ |LE|Li cell**

**S15. Calculated  $\text{DLi}^+$  for LFP cathodes in  $\text{LiFePO}_4$ |LE|Li cell**

**S16. XPS analysis of lithium metal anode in GPE system after 10 cycles**

**S17. XPS analysis of lithium metal anode in LE system after 10 cycles**

**S18. Atomic ratios of SEI formed in the LE**

**S19. Atomic ratios of SEI formed in the GPE**

**S20. Schematic illustration of  $\text{Li}^+$  transporting process in SEI on Li anode**

**S21. Electrochemical performances of gel electrolytes reported in the literature**

## S1. Calculation of ionic conductivity

The ionic conductivity ( $\sigma$ ) can be calculated using the following equation:

$$\sigma = \frac{l}{R_b A}$$

where  $l$  stands for the film thickness,  $R_b$  represents the bulk resistance, and  $A$  represents the area.

## S2. Calculation of Li<sup>+</sup> transference numbers

The Li<sup>+</sup> transference numbers ( $t_{Li^+}$ ) were measured by DC polarization/AC impedance in symmetric Li/GPEs/Li cells. The  $t_{Li^+}$  value can be calculated using the following equation:

$$t_{Li^+} = \frac{I_{ss}(\Delta V - I_0 R_0)}{I_0(\Delta V - I_{ss} R_{ss})}$$

where  $\Delta V$  is the polarization voltage applied (10 mV),  $I_0$  and  $R_0$  represent the initial current and interfacial resistance respectively, and  $I_{ss}$  and  $R_{ss}$  are the steady-state current and interfacial resistance after polarization for 10000 s, respectively.

### S3. Calculation of activation energy

Activation energy ( $E_a$ ) was used to demonstrate the difficulty level of Li-ion transference. The behavior of  $\sigma$  and  $E_a$  mainly obeys the Arrhenius equation:

$$\sigma = \sigma_0 \exp\left(\frac{-E_a}{RT}\right)$$

### S4. Choice on different $\text{Li}^+$ adsorption sites

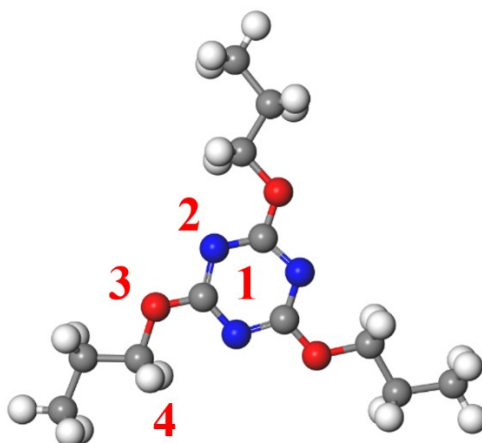

**Figure S1.** Choice on different  $\text{Li}^+$  adsorption sites

### S5. Crystal models for calculating the binding energy

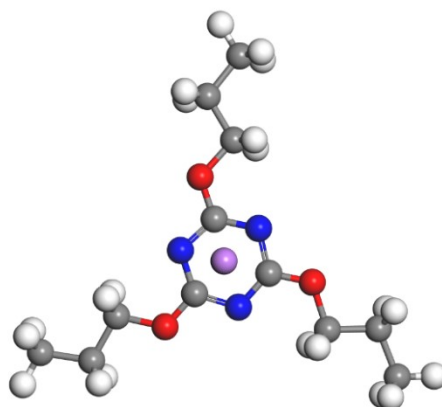

$$E_b = -1.37 \text{ eV}$$

**Figure S2.** Crystal models for calculating the binding energy of a  $\text{Li}^+$  adsorbed on position 1

### S6. Corresponding charge density difference

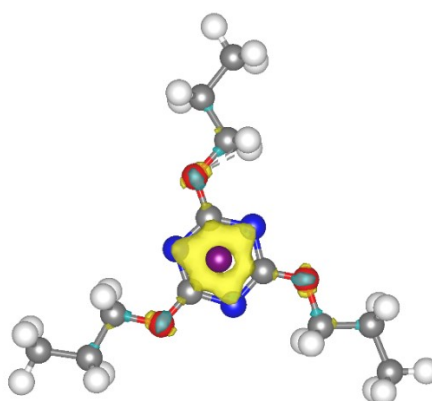

**Figure S3.** corresponding charge density difference (gray, blue, red, and purple balls represent carbon atoms, nitrogen atoms, oxygen atoms and Li atoms, respectively; yellow and light blue areas represent positive and negative charge differences, respectively)

### S7. Room temperature storage experiment

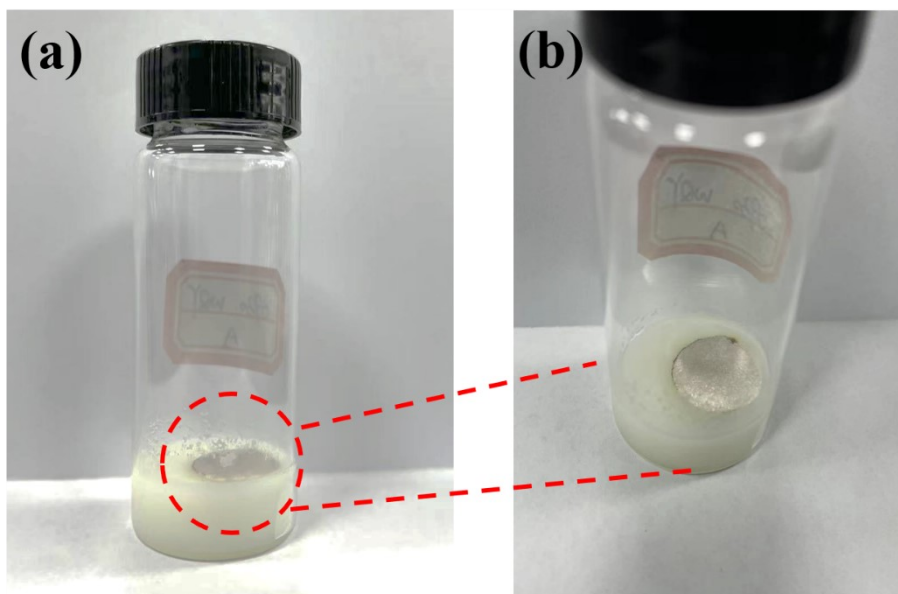

Figure S4. Room temperature storage experiment

### S8. TGA analysis of commercial separator

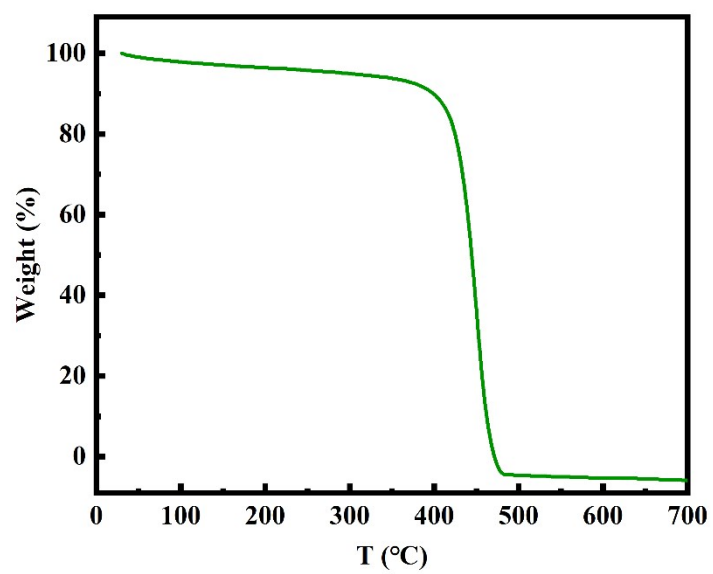

Figure S5. TGA analysis of commercial separator.

**S9. EIS of a SS|GPE 1%|SS symmetrical cell with the elevation of temperature**

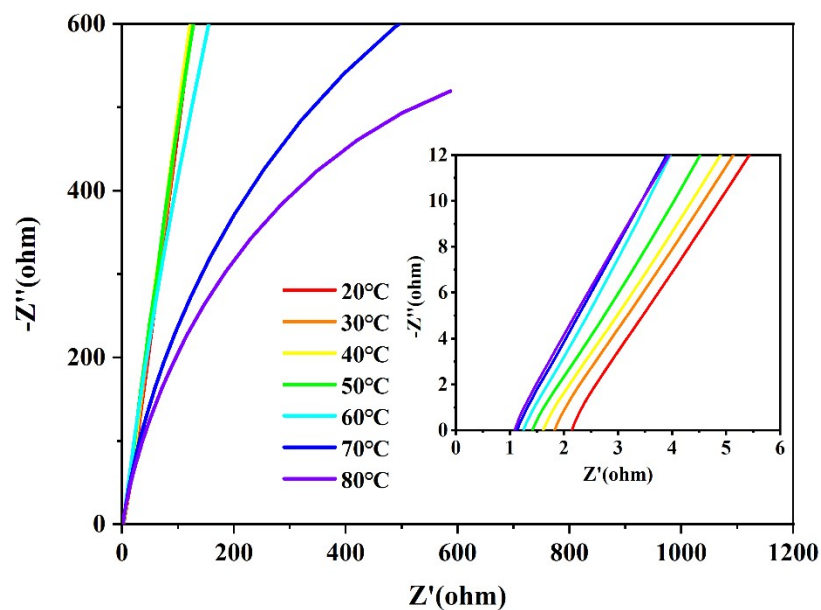

**Figure S6.** EIS of a SS|GPE 1%|SS cell with the elevation of temperature

**S10. EIS of a SS|GPE 2%|SS symmetrical cell with the elevation of temperature**

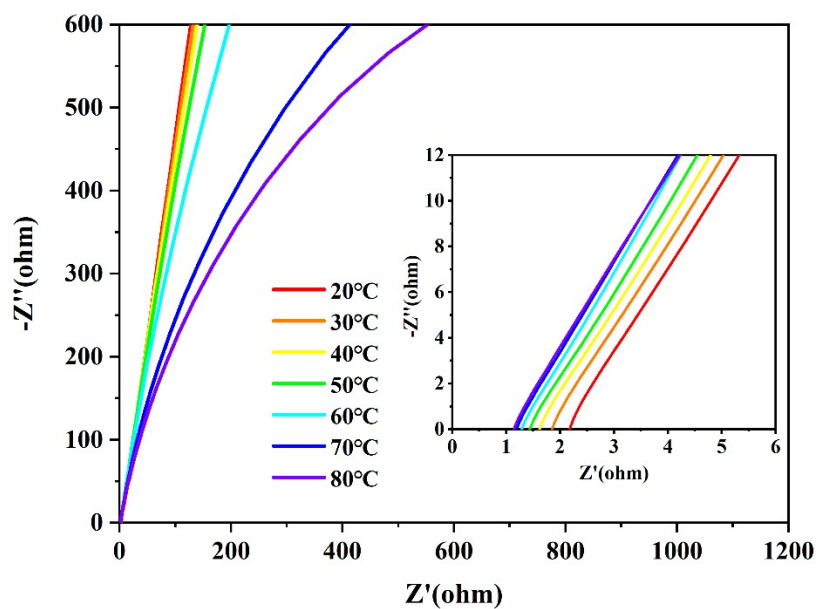

**Figure S7.** EIS of a SS|GPE 2%|SS cell with the elevation of temperature



**S11. EIS of a SS|GPE 5%|SS symmetrical cell with the elevation of temperature**

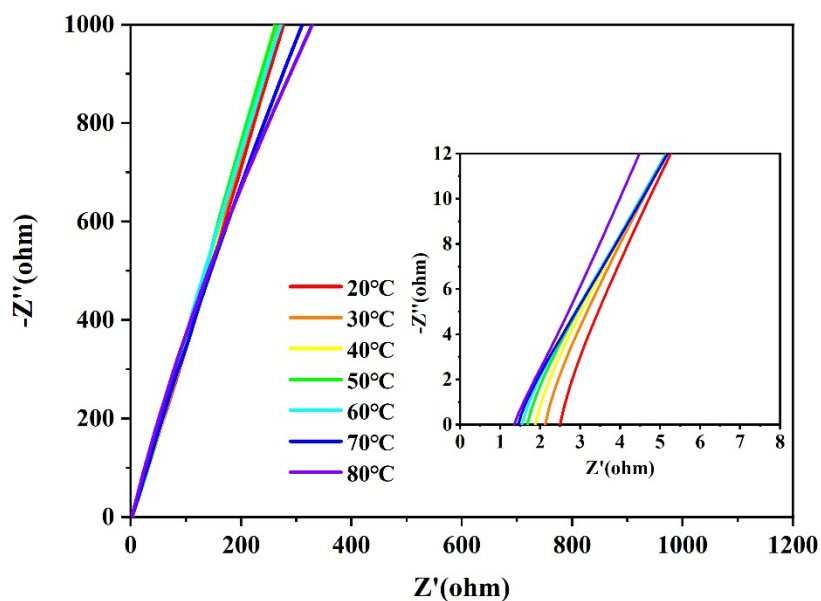

**Figure S8.** EIS of a SS|GPE 5%|SS cell with the elevation of temperature

**S12. Charge/discharge voltage curves of  $\text{LiFePO}_4$ |GPE 1%|Li**

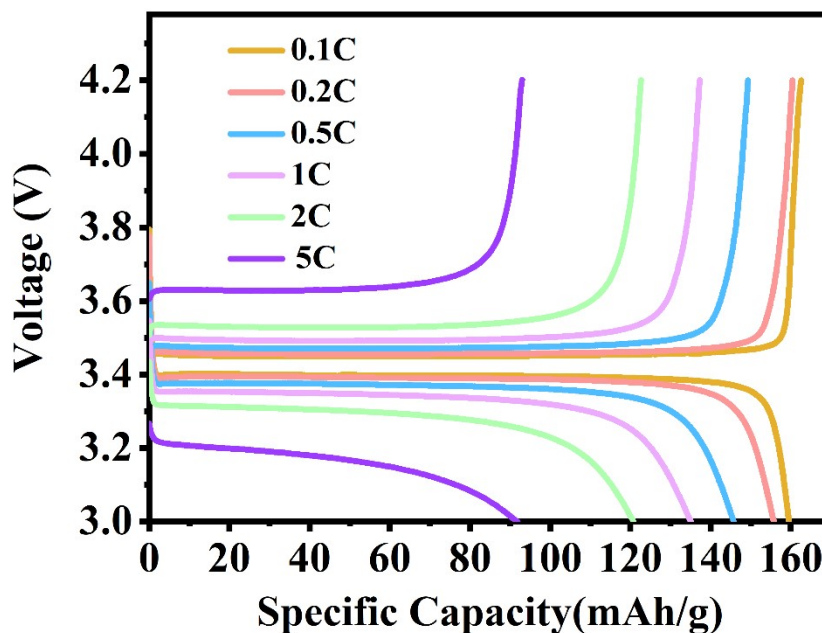

**Figure S9.** Charge/discharge voltage curves of  $\text{LiFePO}_4$ |GPE 1%|Li

### S13. Charge/discharge voltage curves of $\text{LiFePO}_4|\text{GPE 5\%}| \text{Li}$

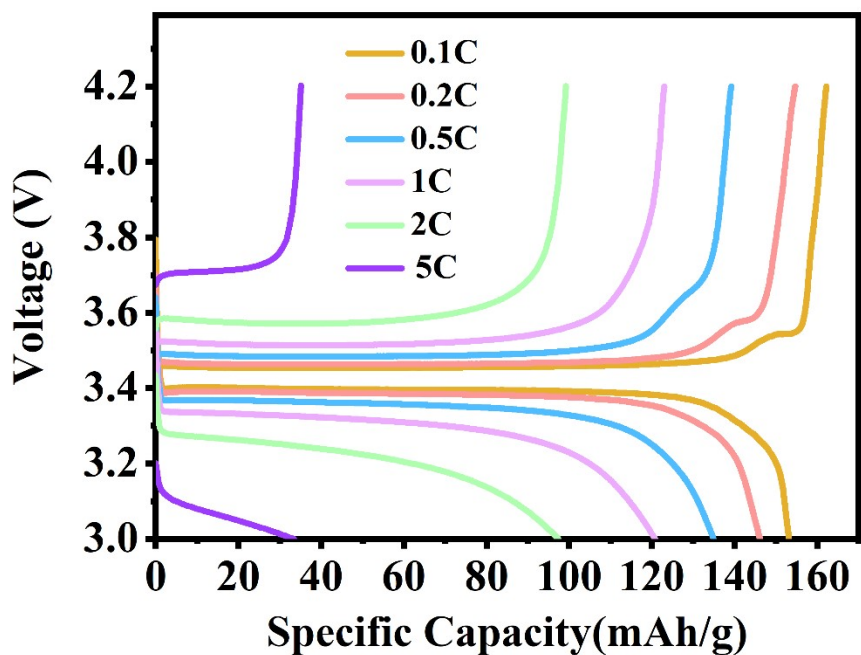

Figure S10. Charge/discharge voltage curves of  $\text{LiFePO}_4|\text{GPE 5\%}| \text{Li}$

### S14. Cyclic voltammograms and rate capability of $\text{LiFePO}_4|\text{LE}| \text{Li}$ cell

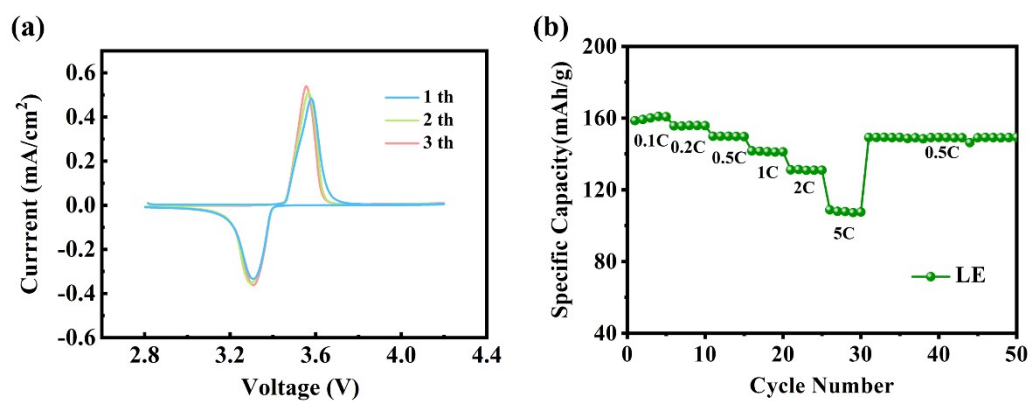

Figure S11. Cyclic voltammograms (a) and rate capability (b) of  $\text{LiFePO}_4|\text{LE}| \text{Li}$  cell

**S15. Calculated  $DLi^+$  for LFP cathodes in  $LiFePO_4|LE|Li$  cell**

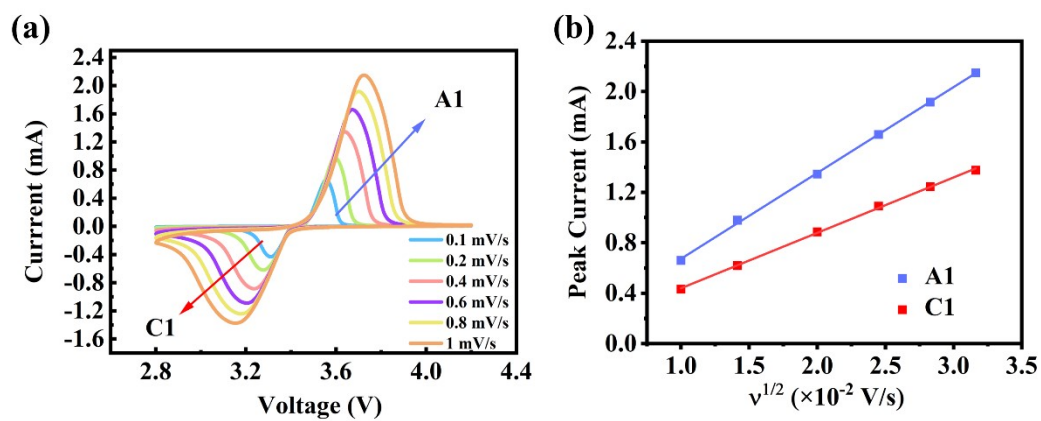

**Figure S12.** (a) The CV curve of  $LiFePO_4|GPE|Li$  at various sweep rates. (b) The slopes of redox peaks current of  $LiFePO_4|GPE|Li$  from CVs vs. a square root function of sweep rates.

S16. XPS analysis of lithium metal anode in GPE system after 10 cycles

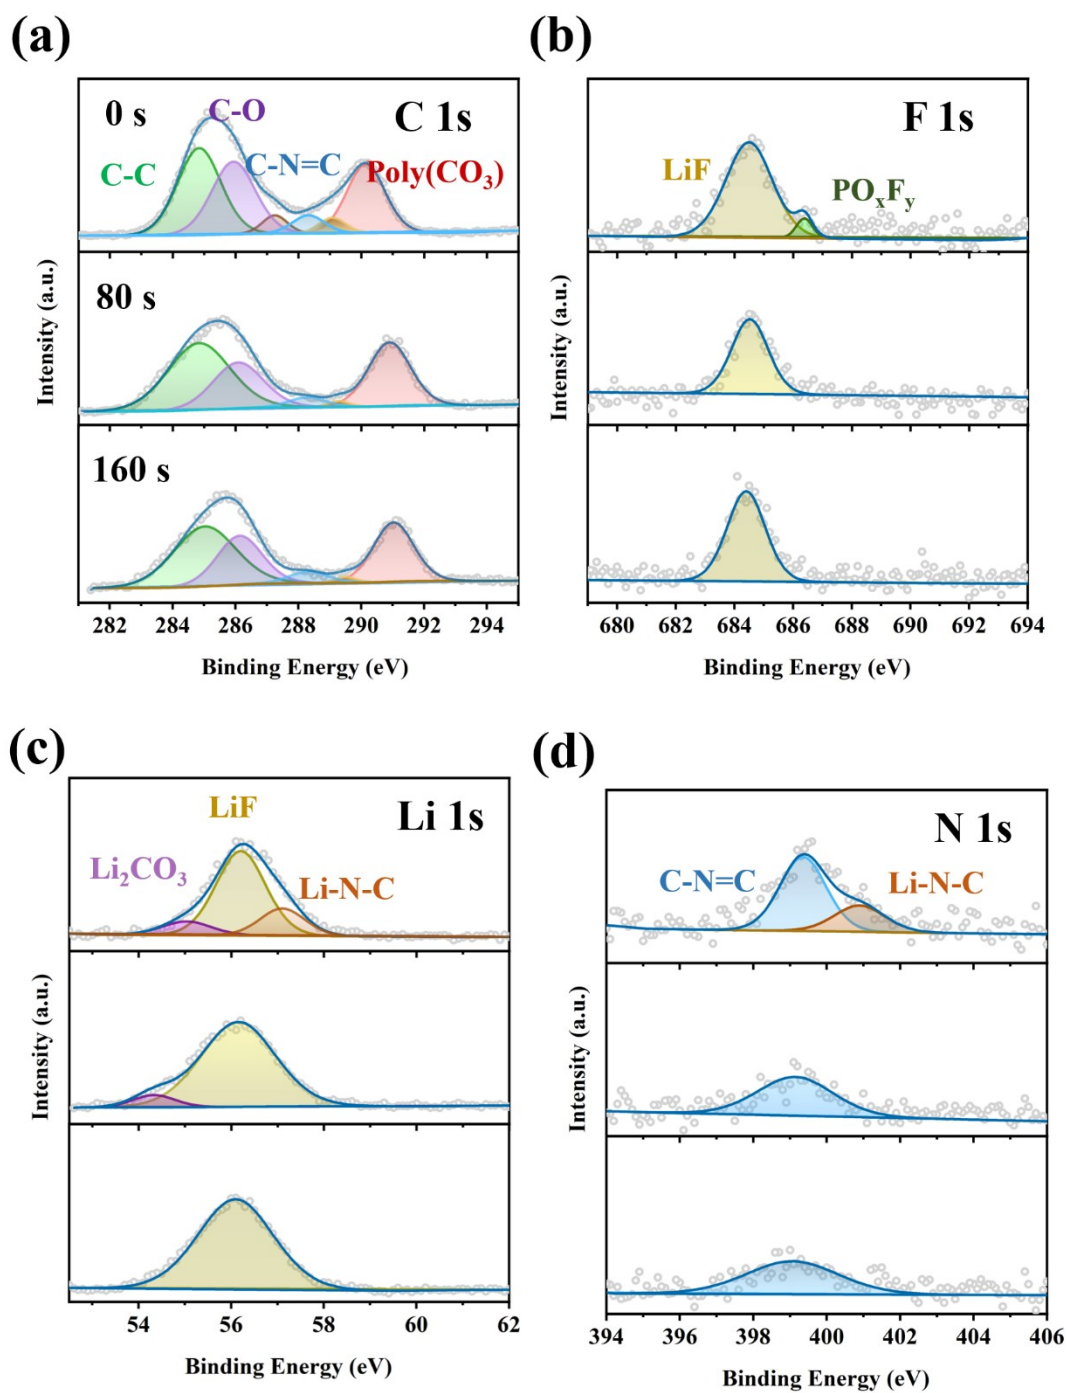

**Figure S13.** XPS spectra of C 1s (a), F 1s (b), Li 1s (c) and N (d) for lithium metal retrieved from GPE in 10 cycles.

### S17. XPS analysis of lithium metal anode in LE system after 10 cycles

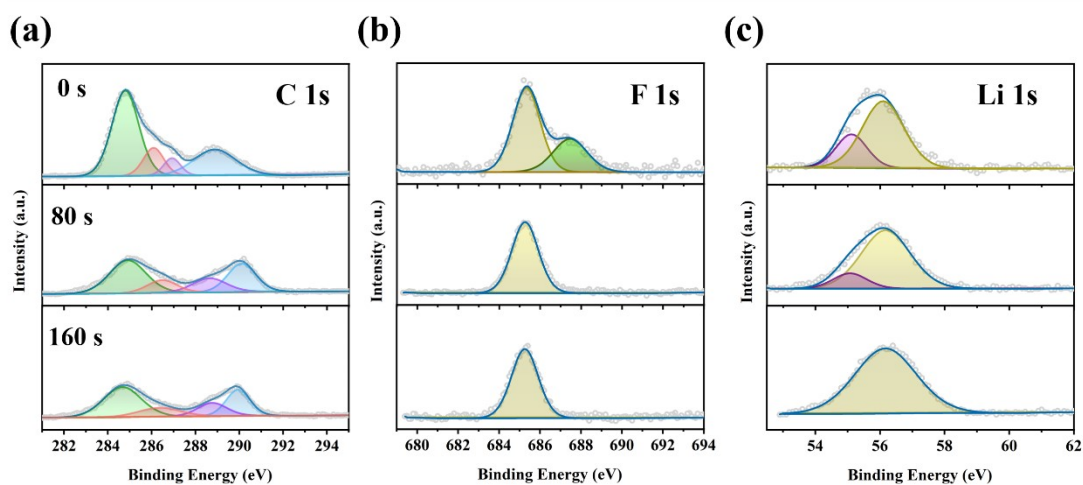

**Figure S14.** XPS spectra of C 1s (a), F 1s (b) and Li 1s (c) for lithium metal retrieved from LE in 10 cycles.

### S18. Atomic ratios of SEI formed in the LE

Table S1 Atomic ratios of SEI formed in the LE

| Etch Time (s) | Li (atomic %) | C (atomic %) | F (atomic %) |
|---------------|---------------|--------------|--------------|
| 0             | 42.476        | 50.842       | 6.682        |
| 80            | 65.376        | 19.804       | 14.820       |
| 160           | 71.956        | 16.364       | 11.680       |

### S19. Atomic ratios of SEI formed in the GPE

Table S2 Atomic ratios of SEI formed in the GPE

| Etch Time (s) | Li<br>(atomic %) | C<br>(atomic %) | N<br>(atomic %) | F<br>(atomic %) |
|---------------|------------------|-----------------|-----------------|-----------------|
| 0             | 32.022           | 62.840          | 2.118           | 3.020           |
| 80            | 47.955           | 46.469          | 1.680           | 3.896           |
| 160           | 54.141           | 40.521          | 1.438           | 3.900           |

### S20. Schematic illustration of Li<sup>+</sup> transporting process in SEI on Li anode

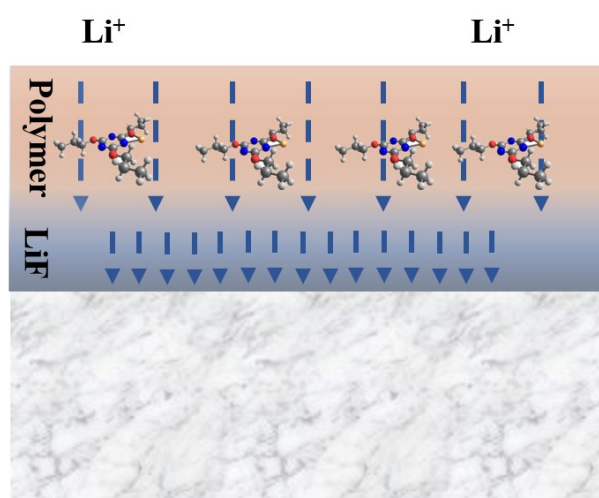

**Figure S15.** Schematic illustration of Li<sup>+</sup> transporting process in SEI on Li anode

## S21. Electrochemical performances of gel electrolytes reported in the literature

Table S3. Electrochemical performances of gel electrolytes reported in the literature

| GPE ingredients                        | Room temperature ionic conductivity/<br>(mS/cm) | Preparation method | Cell(cycles)capacity retention/C-rate | Ref       |
|----------------------------------------|-------------------------------------------------|--------------------|---------------------------------------|-----------|
| Poly (diethylene glycol carbonate)     | 0.16                                            | In situ            | LFP/Li(100th)95%/0.2C                 | 1         |
| PVDF GPE with BN additive              | 0.81                                            | Ex situ            | LFP/Li(300th)88%/1C                   | 2         |
| Polymerized poly (tetrahydrofuran)     | 0.23                                            | In situ            | LFP/Li(100th)91.3%/0.1C               | 3         |
| Ultraviolet solidified gel electrolyte | 1                                               | In situ            | LFP/Li(200th)77.6%/1C                 | 4         |
| PE supported GPE                       | 0.45                                            | Ex situ            | LCO/Li(300th)62.7%/0.2C               | 5         |
| PMMA/PVDF hybrid polymer               | -                                               | Ex situ            | NCA/Li(200th)86.1%/1C                 | 6         |
| A dual-salt cross-linked network       | 0.56                                            | In situ            | LFP/Li(300th)87.9%/0.5C               | 7         |
| PEGDA GPE with CA additive             | 8.81                                            | In situ            | LCO/Li(100th)87%/0.5C                 | 8         |
| A borate-rich 3D network               | 0.84                                            | In situ            | LFP/Li(400th)89.7%/0.5C               | 9         |
| A hybrid polymer network               | 7.6                                             | In situ            | LFP/Li(500th)90%/0.5C                 | 10        |
| polymer with triazine centres          | 7.93                                            | In situ            | LFP/Li(700th)80.6%/1C                 | This work |

[1] Liu X, Ding G, Zhou X, et al. An interpenetrating network poly (diethylene glycol carbonate)-based polymer electrolyte for solid state lithium batteries[J]. Journal of Materials Chemistry A, 2017, 5(22): 11124-11130.

[2] Shim J, Kim H J, Kim B G, et al. 2D boron nitride nanoflakes as a multifunctional

additive in gel polymer electrolytes for safe, long cycle life and high rate lithium metal batteries[J]. *Energy & Environmental Science*, 2017, 10(9): 1911-1916.

[3] Huang S, Cui Z, Qiao L, et al. An in-situ polymerized solid polymer electrolyte enables excellent interfacial compatibility in lithium batteries[J]. *Electrochimica Acta*, 2019, 299: 820-827.

[4] Zhang S Z, Xia X H, Xie D, et al. Facile interfacial modification via in-situ ultraviolet solidified gel polymer electrolyte for high-performance solid-state lithium ion batteries[J]. *Journal of Power Sources*, 2019, 409: 31-37.

[5] Wang Y, Fu L, Shi L, et al. Gel polymer electrolyte with high Li<sup>+</sup> transference number enhancing the cycling stability of lithium anodes[J]. *ACS applied materials & interfaces*, 2019, 11(5): 5168-5175.

[6] Zhou Z, Feng Y, Wang J, et al. A robust, highly stretchable ion-conductive skin for stable lithium metal batteries[J]. *Chemical Engineering Journal*, 2020, 396: 125254.

[7] Fan W, Li N W, Zhang X, et al. A dual-salt gel polymer electrolyte with 3D cross-linked polymer network for dendrite-free lithium metal batteries[J]. *Advanced Science*, 2018, 5(9): 1800559.

[8] Liu M, Wang Y, Li M, et al. A new composite gel polymer electrolyte based on matrix of PEGDA with high ionic conductivity for lithium-ion batteries[J]. *Electrochimica Acta*, 2020, 354: 136622.

[9] Dai K, Ma C, Feng Y, et al. A borate-rich, cross-linked gel polymer electrolyte with near-single ion conduction for lithium metal batteries[J]. *Journal of Materials Chemistry A*, 2019, 7(31): 18547-18557.

[10] Wang Q, Xu X, Hong B, et al. Molecular engineering of a gel polymer electrolyte via in-situ polymerization for high performance lithium metal batteries[J]. *Chemical Engineering Journal*, 2021, 131331.
